# Supplementary material for: Regulation of Transient Receptor Potential Canonical 4 Activity by Phospholipase C-δ1
Source: Research Square preprint supplement (doi:10.21203/rs.3.rs-107953/v1), 2020-11-24
Supplement: Supplementary file 1 [file 67a74641c1427f1885509cf7.docx]

**Supplementary information**

**Regulation of transient receptor potential canonical 4 activity by phospholipase C-δ1**

Juyeon Ko1, Jongyun Myeong2, Misun Kwak1, and Insuk So1

1Department of Physiology, Seoul National University College of Medicine, Seoul, 03080, Republic of Korea, 2Department of Physiology and Biophysics, University of Washington School of Medicine, Seattle, WA 98195, USA

*To whom correspondence should be addressed:
Insuk So, Department of Physiology, Seoul National University College of Medicine, Seoul, 03080; [insuk@snu.ac.kr](mailto:insuk@snu.ac.kr); Tel. (82) 2-740-8228; Fax. (001) 82-2-763-9667

**
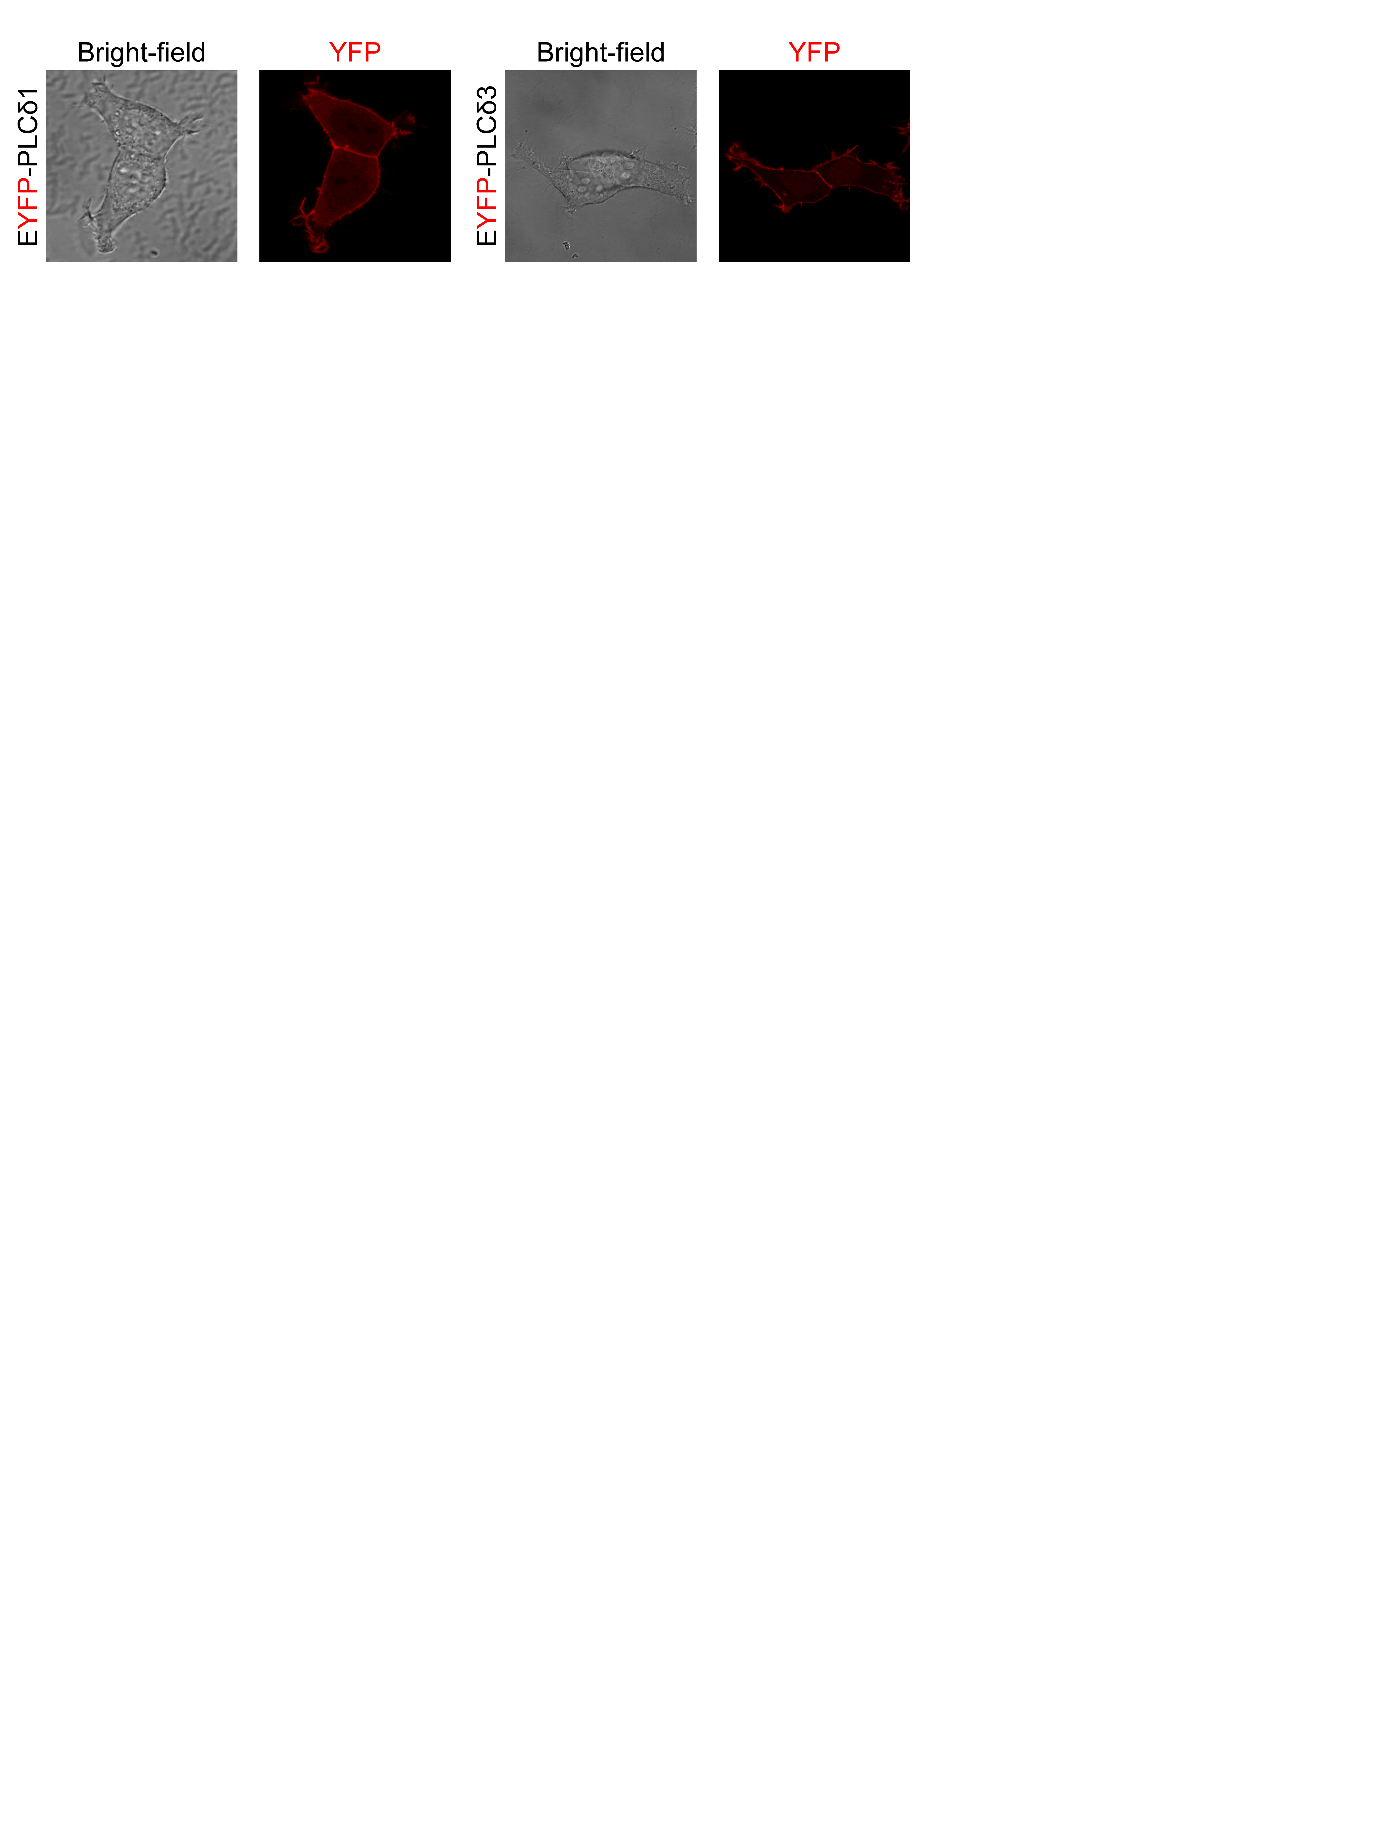
Supplementary Figure S1.** Images of PLCδ1 and PLCδ3. HEK293 cells are overexpressed with EYFP-PLCδ1 or EYFP-PLCδ3.

**
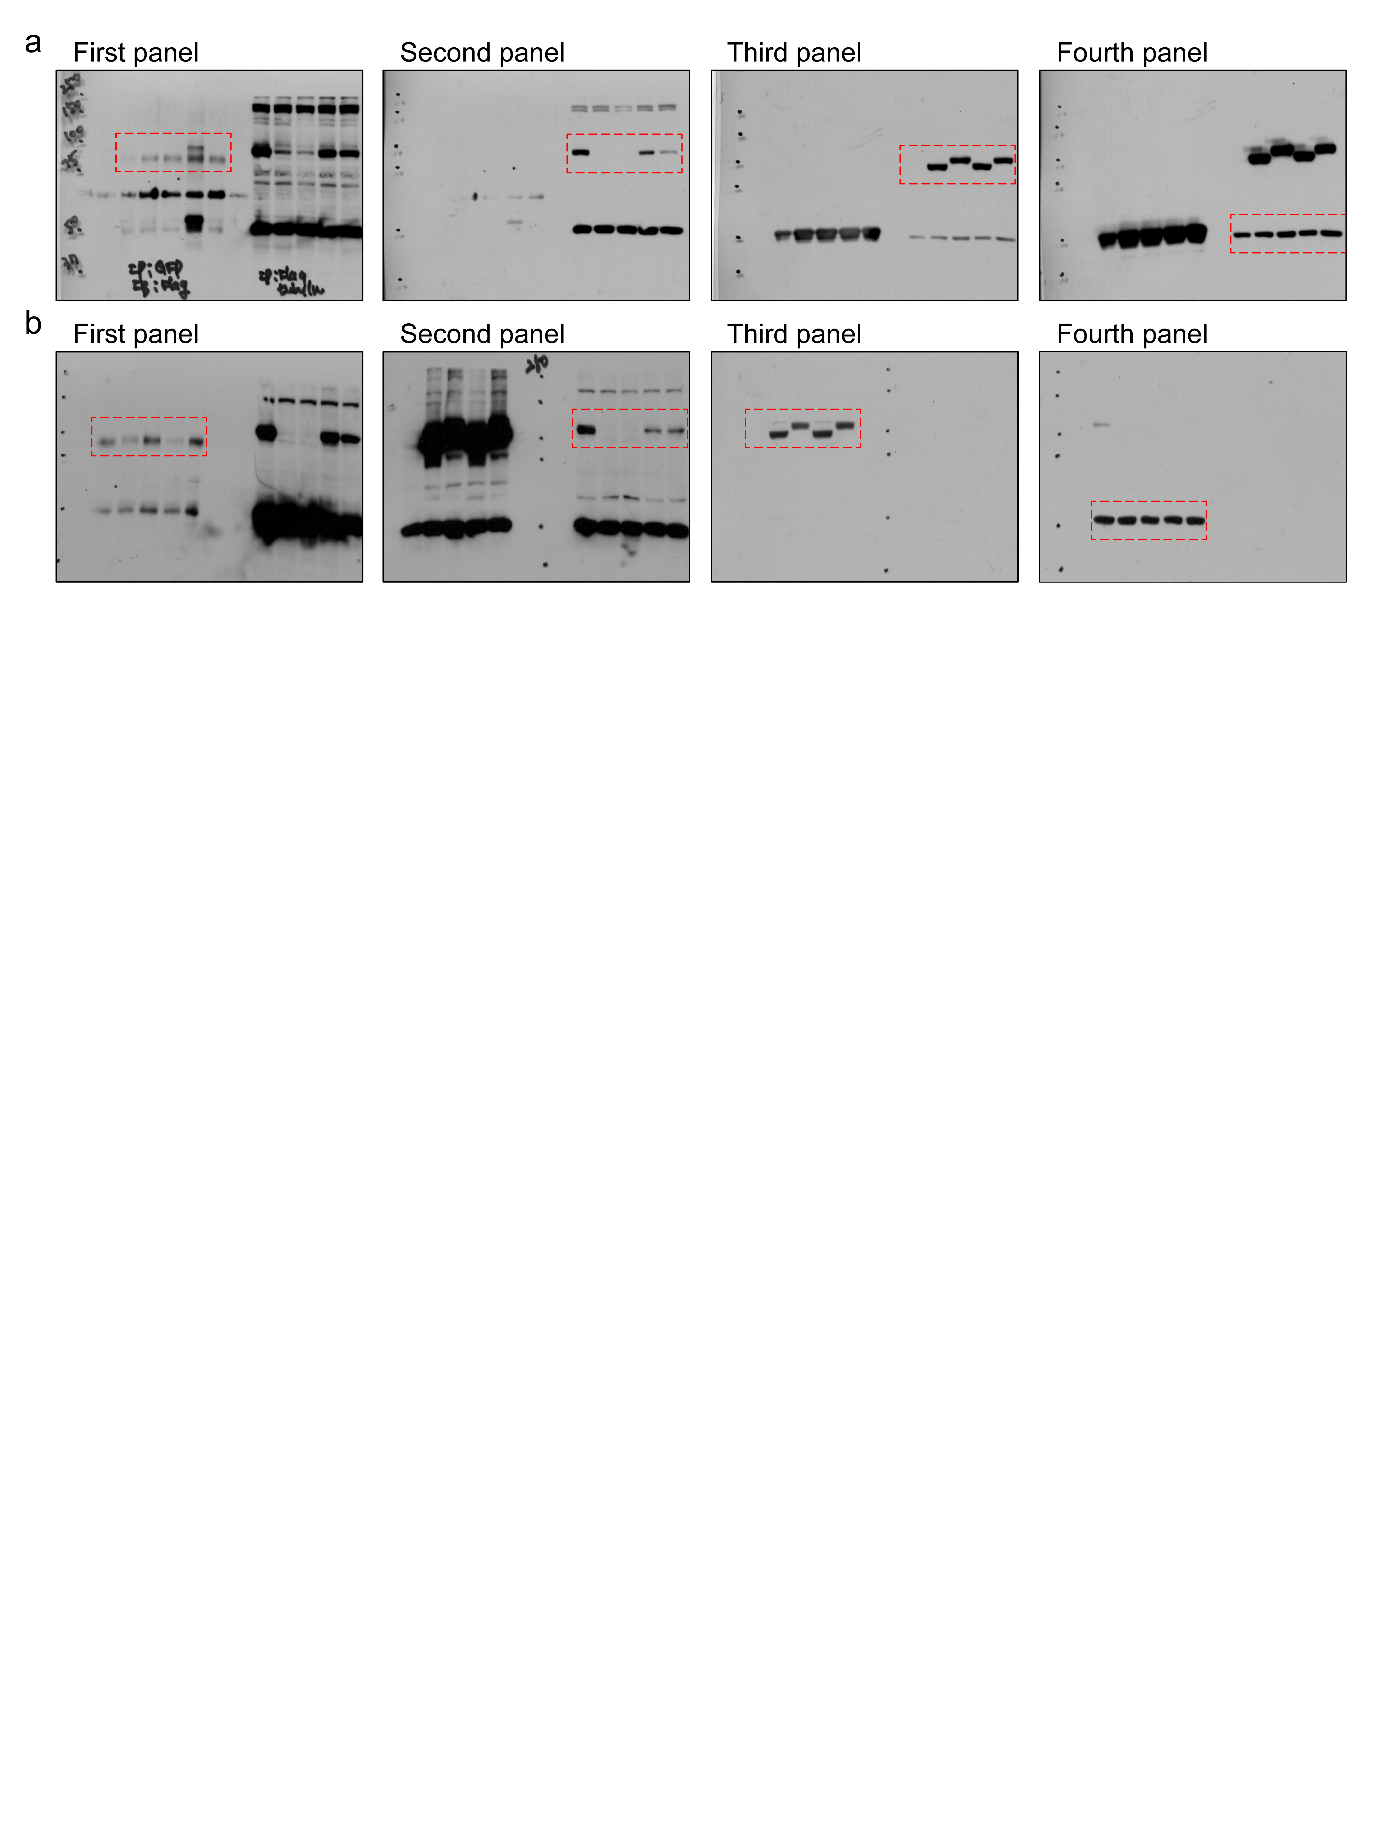
Supplementary Figure S2.** Fullblot images for Figure 1e. The area enclosed by the red dashed box is the cropping locations.

**
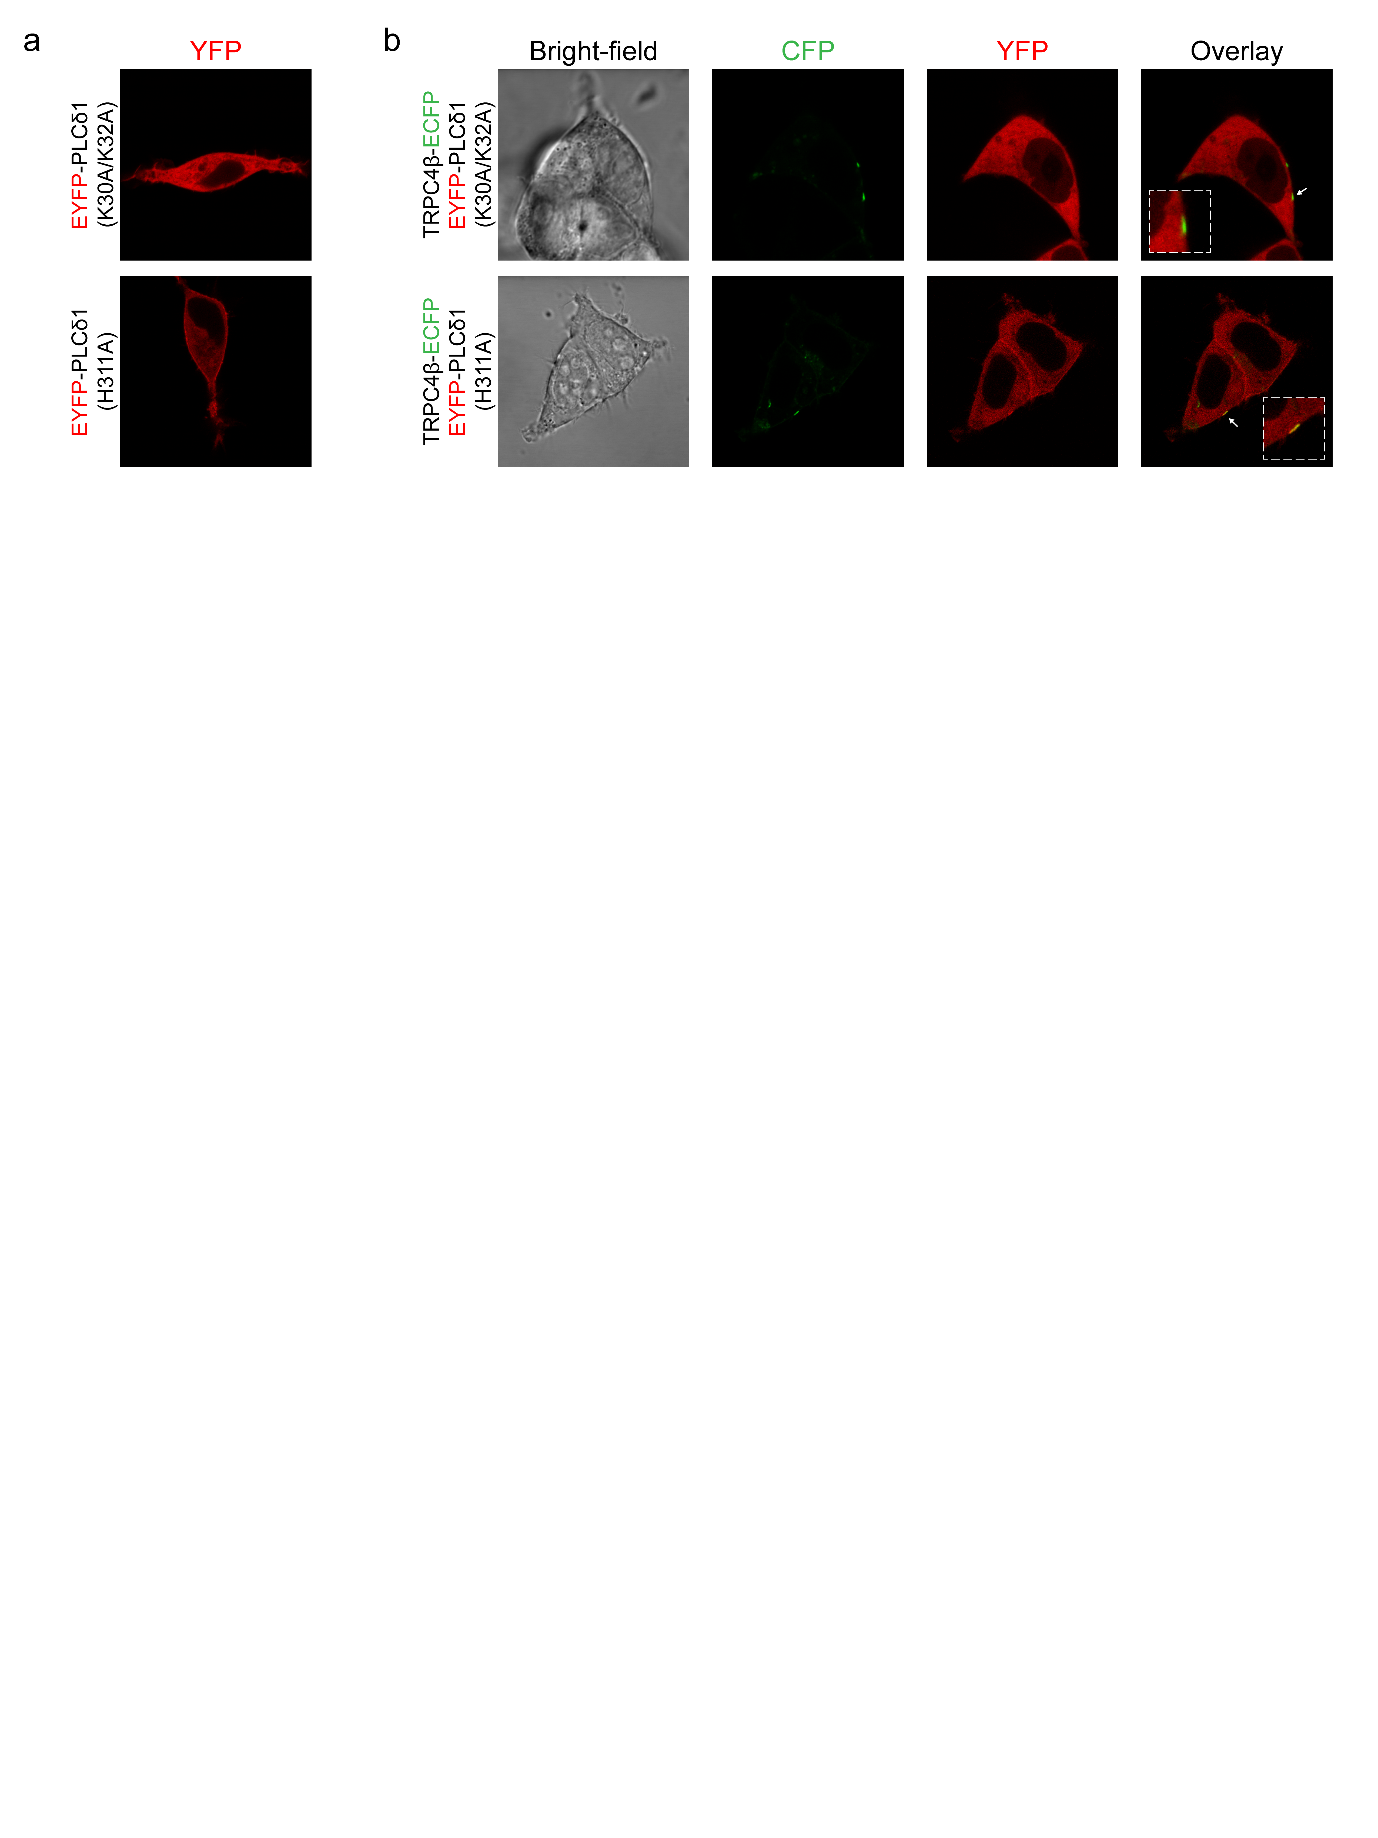
Supplementary Figure S3.** Expression pattern of PLCδ1 mutant.

(a) Images of PLCδ1 mutants. HEK293 cells are overexpressed with YFP-PLCδ1 (K30A/K32A) or YFP-PLCδ1 (H311A). (b) Localizations of TRPC4 and PLCδ mutant. *Upper panel*: TRPC4 with PLCδ1 (K30A/K32A); *Lower panel*: TRPC4 with PLCδ1 (H311A); ECFP-tagged channel and EYFP-tagged PLCδ were co-expressed in HEK293 cells. The area enclosed by the red dashed box is the zoomed region indicated by arrow in overlay images
